# Supplementary material for: Exploring the ’EarSwitch’ concept: a novel ear based control method for assistive technology
Source: PubMed Central journal article supplement (PMC11613744; doi:10.1186/s12984-024-01500-z), 2024-12-02
Supplement: 12984_2024_1500_MOESM6_ESM.pdf [file 12984_2024_1500_MOESM6_ESM.pdf]

Independent assessor scores from the independent movement analysis:

| <b>Video</b> | <b>Assessor 1</b> | <b>Assessor 2</b> | <b>Assessor 3</b> | <b>Movement Y/N (Majority)</b> | <b>Movement binary score</b> |
|--------------|-------------------|-------------------|-------------------|--------------------------------|------------------------------|
| 1            | 2                 | 3                 | 2                 | Y                              | 1                            |
| 2            | 1                 | 1                 | 1                 | Y                              | 1                            |
| 3            | 2                 | 2                 | 1                 | Y                              | 1                            |
| 4            | 1                 | 1                 | 1                 | Y                              | 1                            |
| 5            | 2                 | 3                 | 2                 | Y                              | 1                            |
| 6            | 3                 | 3                 | 3                 | Y                              | 1                            |
| 7            | 0                 | 0                 | 0                 | N                              | 0                            |
| 8            | 3                 | 3                 | 3                 | Y                              | 1                            |
| 9            | 2                 | 3                 | 2                 | Y                              | 1                            |
| 10           | 1                 | 2                 | 2                 | Y                              | 1                            |
